# Supplementary material for: Dysfunction of circulating CD3+CD56+ NKT-like cells in type 2 diabetes mellitus
Source: PubMed Central journal article supplement (PMC10110473; doi:10.7150/ijms.83317), 2023-04-02
Supplement: ijmsv20p0652s1.pdf [file ijmsv20p0652s1.pdf]

## Supplementary Figures

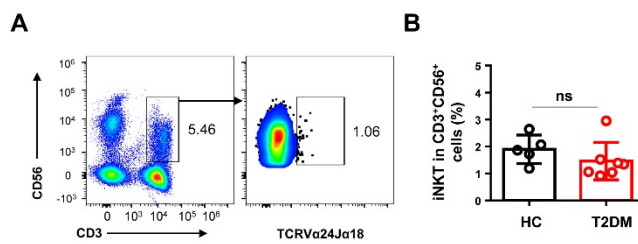

**Supplementary Figure S1.** Comparison of iNKT frequency in T2DM patients and HC. **(A)** Strategy for gating iNKT cells from NKT-like cells via flow cytometry. **(B)** Frequency of iNKT cells from patients with T2DM and healthy controls (HC). Each dot represents a different individual and results are presented as the mean  $\pm$  SEM; n.s., not significant.

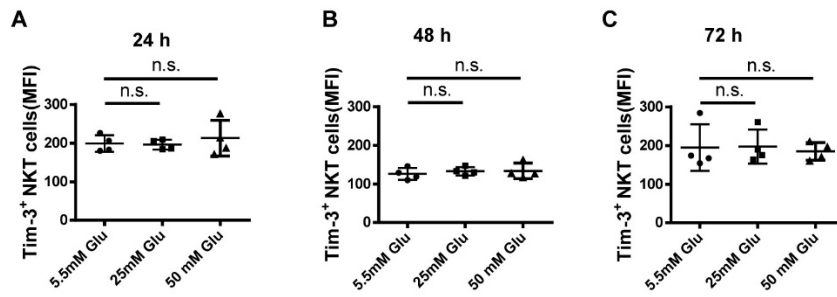

**Supplementary Figure S2.** High glucose treatment does not affect Tim-3 expression on NKT-like cells. PBMCs from healthy donors were cultured in RPMI-1640 medium containing 5.5 mM, 25 mM and 50 mM glucose. Expression of Tim-3 on NK cells after incubation 24h (A), 48h (B) and 72h (C). n.s., not significant.

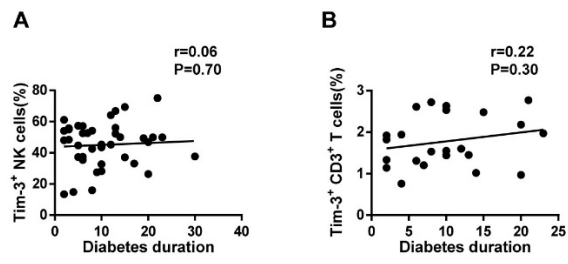

**Supplementary Figure S3.** Correlation analysis of diabetes duration and Tim-3 expression on NK cells (**A**) and T cells (**B**) in T2DM patients.
